# Supplementary material for: Tetraphenylethylene-Substituted Bis(thienyl)imidazole (DTITPE), An Efficient Molecular Sensor for the Detection and Quantification of Fluoride Ions
Source: MDPI journal article supplement (doi:10.3390/chemosensors9100285), 2021-10-06
Supplement: s1 [file s1]

## Supplementary Material

# Tetraphenylethylene-Substituted Bis(thienyl)imidazole (DTITPE), An Efficient Molecular Sensor for the Detection and Quantification of Fluoride Ions

Ranjith Kumar Jakku <sup>1,2,3</sup>, Nedaossadat Mirzadeh <sup>2,3</sup>, Steven H. Privér <sup>3</sup>, Govind Reddy <sup>3,4</sup>, Anil Kumar Vardhaman <sup>4</sup>, Giribabu Lingamallu <sup>2,4,5</sup>, Rajiv Trivedi <sup>1,2,5</sup> and Suresh Kumar Bhargava <sup>2,3,\*</sup>

<sup>1</sup> Catalysis and Fine Chemicals Division, CSIR-Indian Institute of Chemical Technology, Uppal Road, Tarnaka, Hyderabad 500007, India; [ranjithkumar4chem@gmail.com](mailto:ranjithkumar4chem@gmail.com) (R.K.J.); [trivedi@csiriict.in](mailto:trivedi@csiriict.in) (R.T.)

<sup>2</sup> IICT-RMIT Centre, CSIR-Indian Institute of Chemical Technology, Uppal Road, Tarnaka, Hyderabad 500007, India; [nedaossadatmirzadeh@gmail.com](mailto:nedaossadatmirzadeh@gmail.com) (N.M.); [giribabu@iict.res.in](mailto:giribabu@iict.res.in) (G.L.)

<sup>3</sup> Centre for Advanced Materials and Industrial Chemistry (CAMIC), School of Science, RMIT University, GPO Box 2476, Melbourne 3001, Australia; [steven.priver@rmit.edu.au](mailto:steven.priver@rmit.edu.au) (S.H.P.); [r.govindreddy@gmail.com](mailto:r.govindreddy@gmail.com) (G.R.)

<sup>4</sup> Polymer and Functional Materials Division, CSIR-Indian Institute of Chemical Technology, Uppal Road, Tarnaka, Hyderabad 500007, India; [anil1hnk@gmail.com](mailto:anil1hnk@gmail.com)

<sup>5</sup> Academy of Scientific and Innovative Research, AcSIR Headquarters, CSIR-HRDC campus Sector 19,

Kamala Nehru Nagar, Ghaziabad, Uttar Pradesh 201002, India

\* Correspondence: [suresh.bhargava@rmit.edu.au](mailto:suresh.bhargava@rmit.edu.au); Tel.: +61-3-9925-2330

| Sl. NO | Title                                                                               | Page. NO |
|--------|-------------------------------------------------------------------------------------|----------|
| 1      | <sup>1</sup> H and <sup>13</sup> C NMR and mass spectra                             | S2-S6    |
| 2      | FT-IR Spectral Data                                                                 | S6       |
| 3      | U.V-vis. and fluorescence data                                                      |          |
| 3.1    | Benesi-Hildebrand and LOD plots from UV-Vis. data                                   | S7       |
| 3.2    | Benesi-Hildebrand and LOD plots from fluorescence emission data                     | S8       |
| 3.3    | Job's plot                                                                          | S9       |
| 3.4    | <sup>1</sup> H-NMR Data                                                             | S9-S10   |
| 4      | DFT studies                                                                         |          |
| 4.1    | Optimized geometry of DTITPE: B3LYP/6-31+G(d,p)                                     | S11      |
| 4.2    | Optimized geometry of DTITPE.F <sup>-</sup> with F: B3LYP/6-31+G(d,p)               | S12      |
| 4.3    | Optimized geometry of deprotonated DTITPE (DTITPE <sup>-</sup> ): B3LYP/6-31+G(d,p) | S13      |
| 5      | X-ray Crystallographic Data                                                         | S17      |

## 1. Spectroscopy study

### 1.1 $^1\text{H}$ and $^{13}\text{C}$ NMR and mass spectra

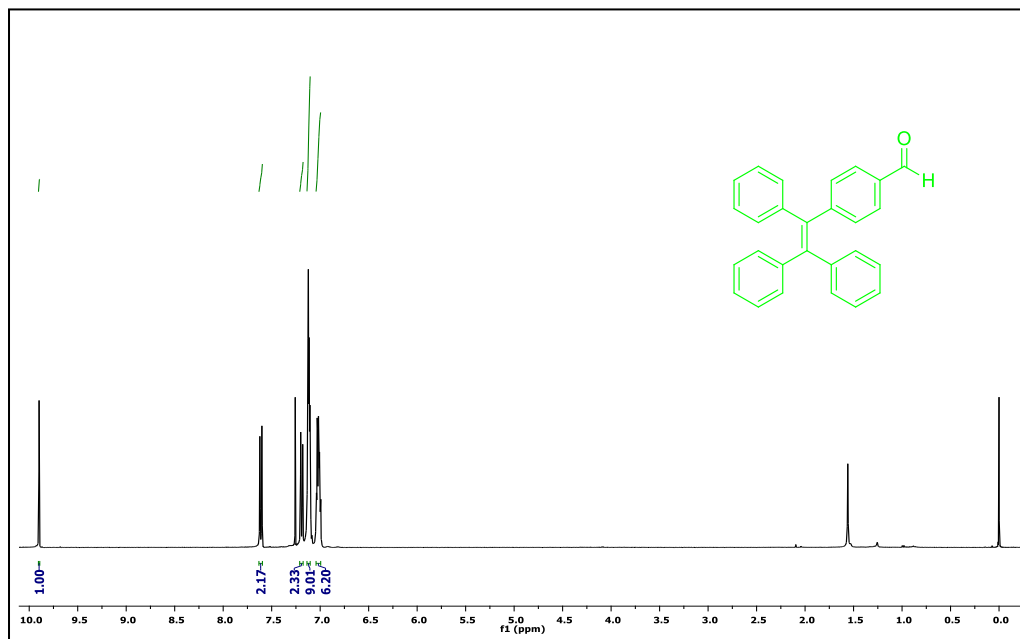

**Figure S1.**  $^1\text{H}$  NMR spectrum of 4-(1,2,2-triphenylvinyl) benzaldehyde (400 MHz,  $\text{CDCl}_3$ ):  $\delta$  9.90 (s, 1H), 7.62 (d, 2H), 7.21 – 7.18 (m, 2H), 7.12 (dd,  $J = 3.7, 3.2$  Hz, 9H), 7.01 (ddt,  $J = 4.7, 2.3, 1.6$  Hz, 6H).

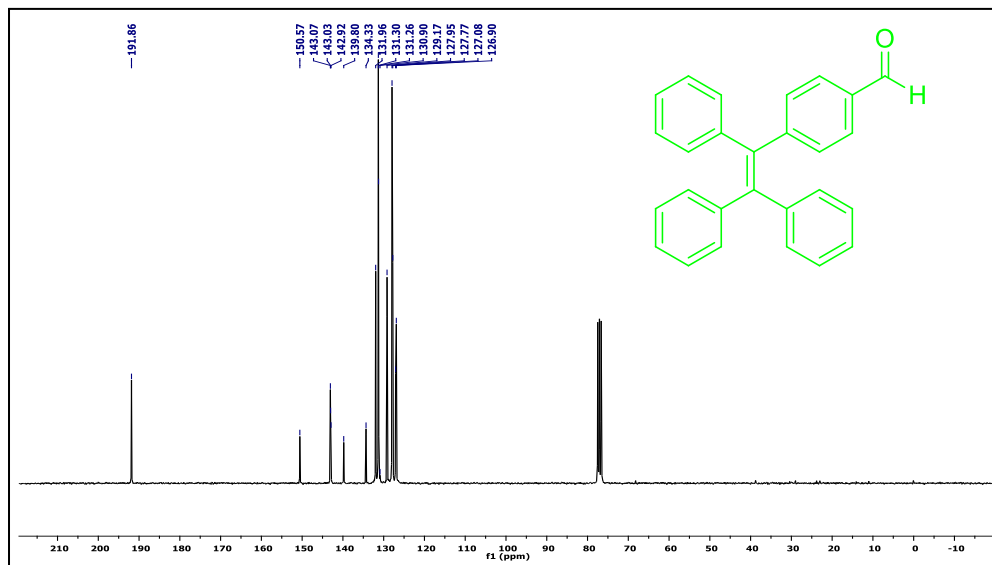

**Figure S2.**  $^{13}\text{C}$  NMR spectrum of 4-(1,2,2-triphenylvinyl) benzaldehyde (75 MHz,  $\text{CDCl}_3$ ):  $\delta$  191.86, 150.57, 143.07, 143.03, 142.92, 139.80, 134.33, 131.96, 131.30, 131.26, 130.90, 129.17, 127.95, 127.77, 127.08, 126.90.

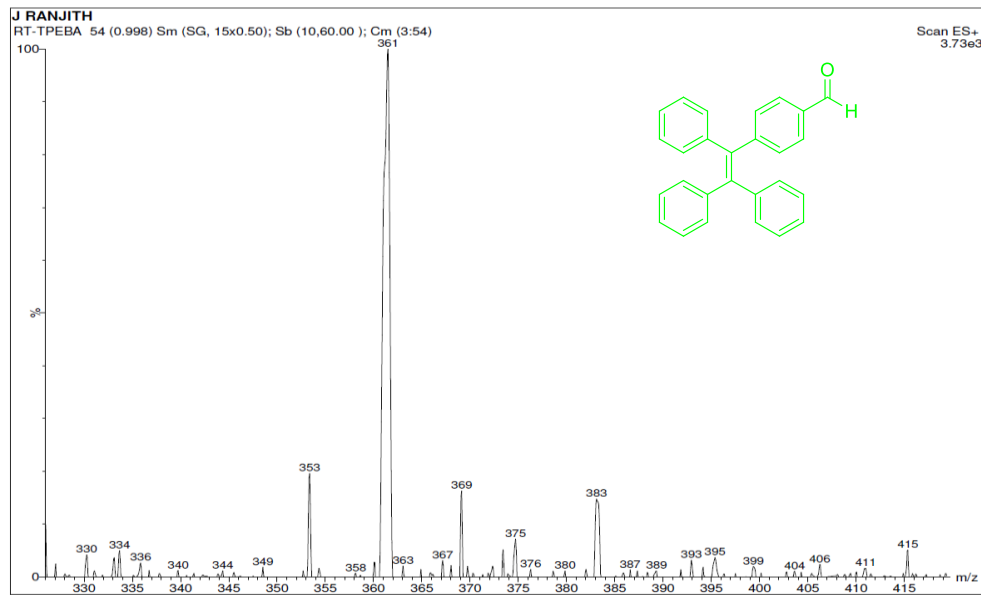

**Figure S3.** ESI mass spectrum of 4-(1,2,2-triphenylvinyl) benzaldehyde:  $m/z$  calculated mass for  $C_{27}H_{20}O$   $m/z=360.1$  and found  $m/z=361$   $[M+H]^+$ .

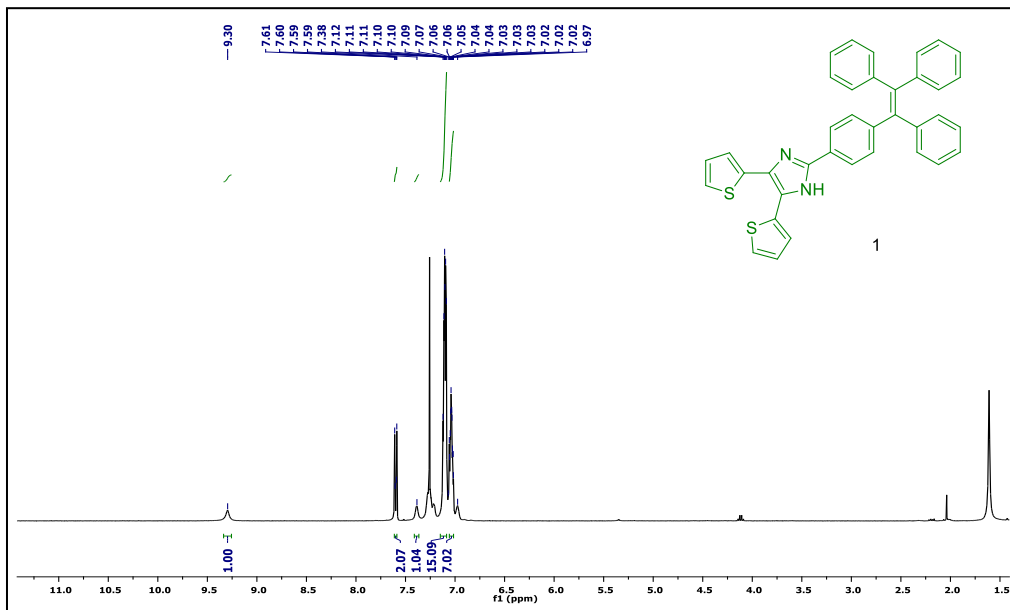

**Figure S4.**  $^1H$  NMR spectrum of DTITPE (400 MHz,  $CDCl_3$ )  $\delta$  9.30 (s, 1H), 7.61 – 7.59 (m, 2H), 7.38 (s, 1H), 7.10 (td,  $J$  = 6.1, 3.3 Hz, 15H), 7.06 – 7.02 (m, 7H).

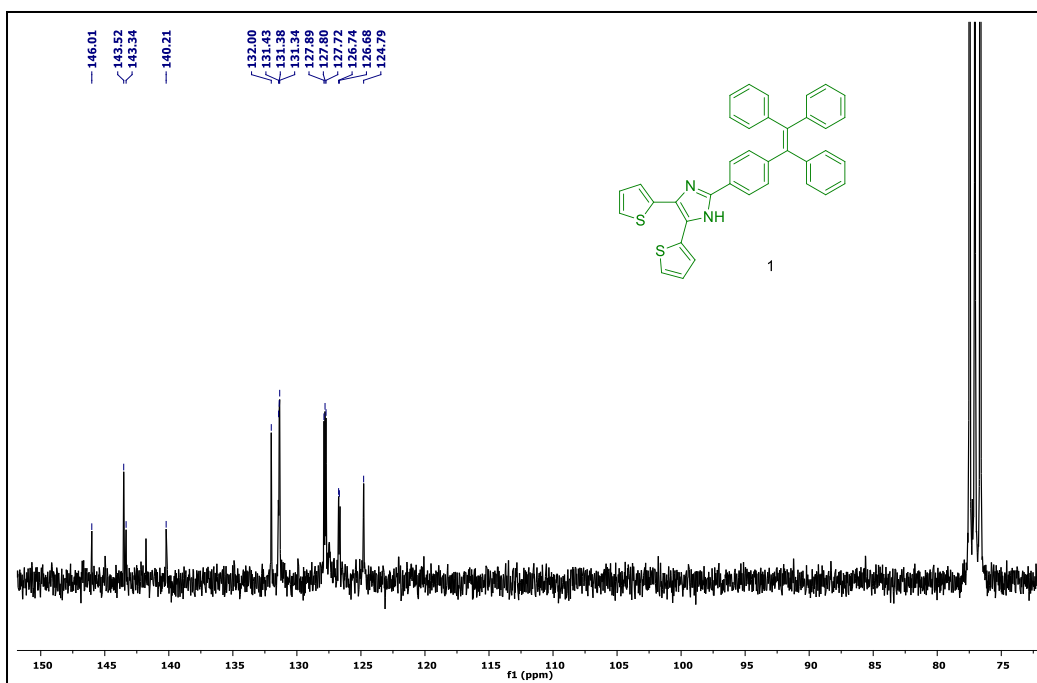

**Figure S5.** <sup>13</sup>C NMR spectrum of DTITPE (75 MHz, CDCl<sub>3</sub>) δ 146.01, 143.52, 143.34, 140.21, 132.00, 131.43, 131.38, 131.34, 127.89, 127.80, 127.72, 126.74, 126.68, 124.79.

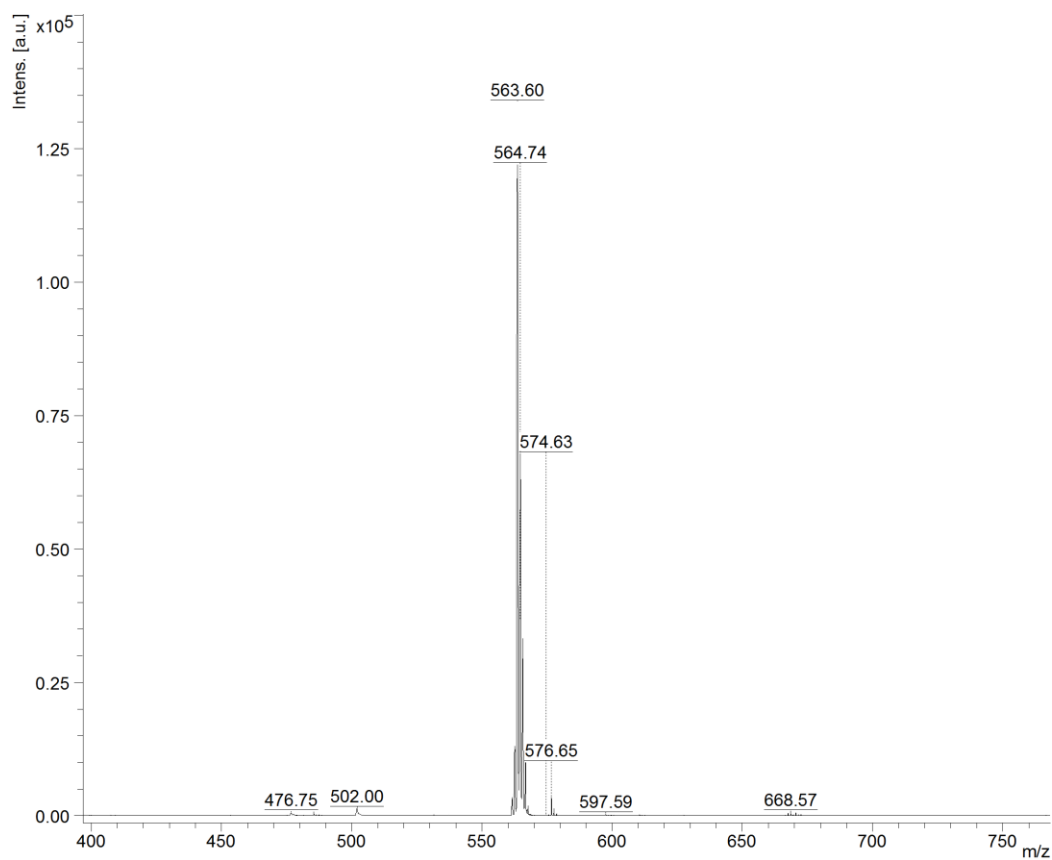

**Figure S6.** MALDI-TOF mass spectrum for DTITPE:  $m/z$  calculated for C<sub>37</sub>N<sub>27</sub>S<sub>2</sub>: 563.2; found: 563.6 [M+H]<sup>+</sup>.

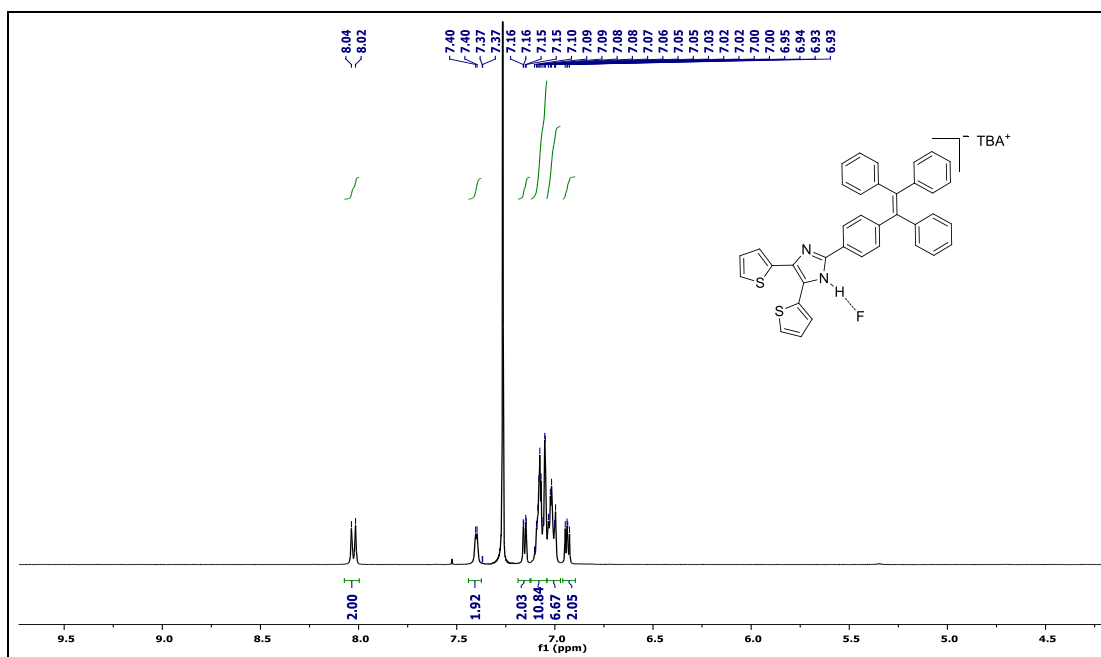

**Figure S7.** <sup>1</sup>H NMR spectrum of DTITPE.F<sup>-</sup> (400 MHz, CDCl<sub>3</sub>): δ 8.03 (d, *J* = 8.4 Hz, 2H), 7.40 (d, *J* = 2.9 Hz, 2H), 7.15 (dd, *J* = 5.1, 0.9 Hz, 2H), 7.12 – 7.04 (m, 10H), 7.04 – 6.97 (m, 6H), 6.94 (dd, *J* = 5.0, 3.6 Hz, 2H).

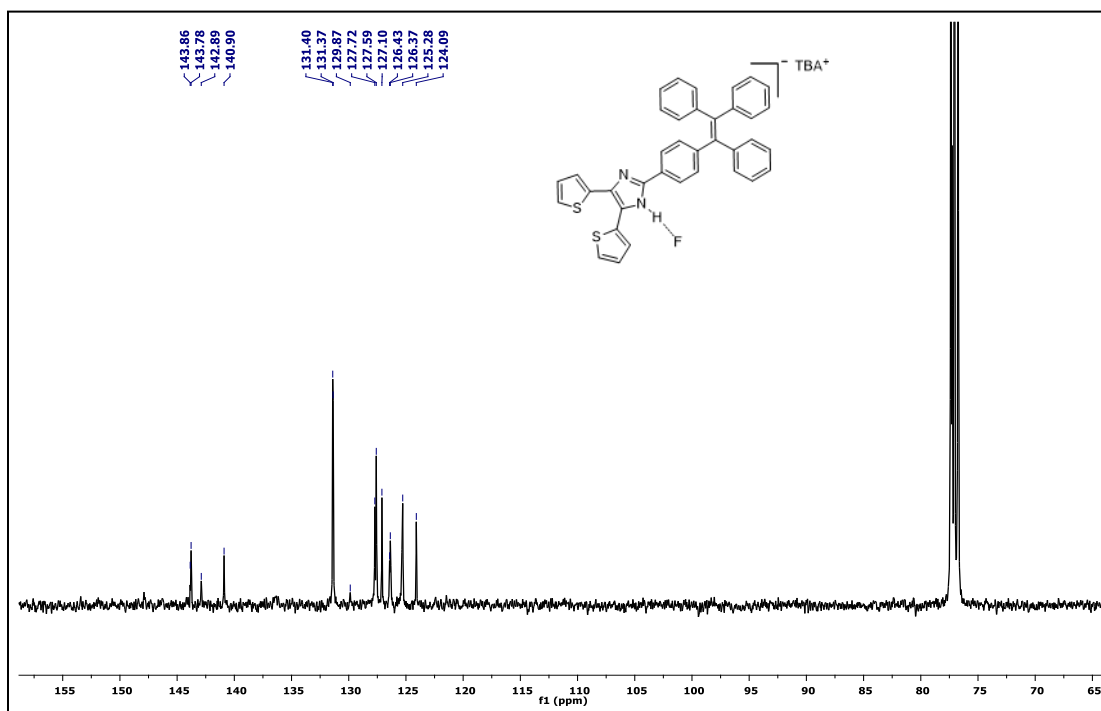

**Figure S8.** <sup>13</sup>C NMR spectrum of DTITPE.F<sup>-</sup> (101 MHz, CDCl<sub>3</sub>): δ 143.86, 143.78, 142.89, 140.90, 131.40, 131.37, 129.87, 127.72, 127.59, 127.10, 126.43, 126.37, 125.28, 124.09.

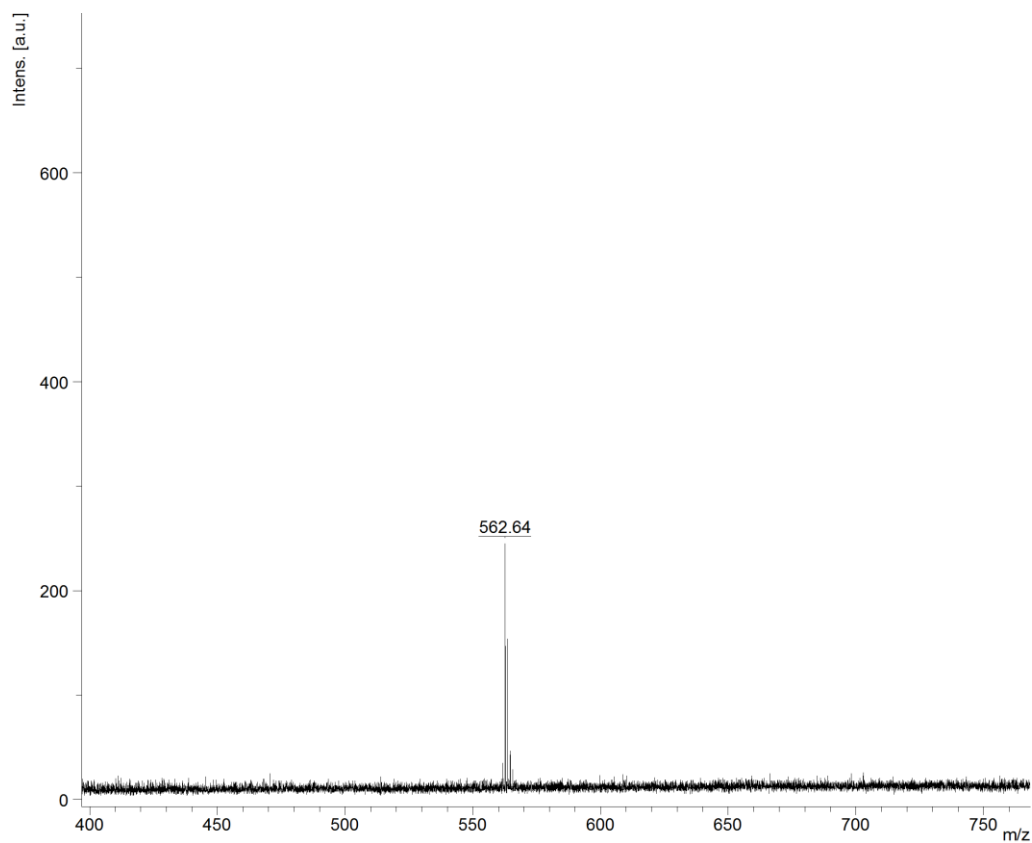

**Figure S9.** MALDI-TOF mass spectrum for DTITPE<sup>-</sup>, calculated mass  $m/z=561.15$  and found  $m/z=562.5$  [M+H]<sup>+</sup>.

## 2. FT- IR Spectra

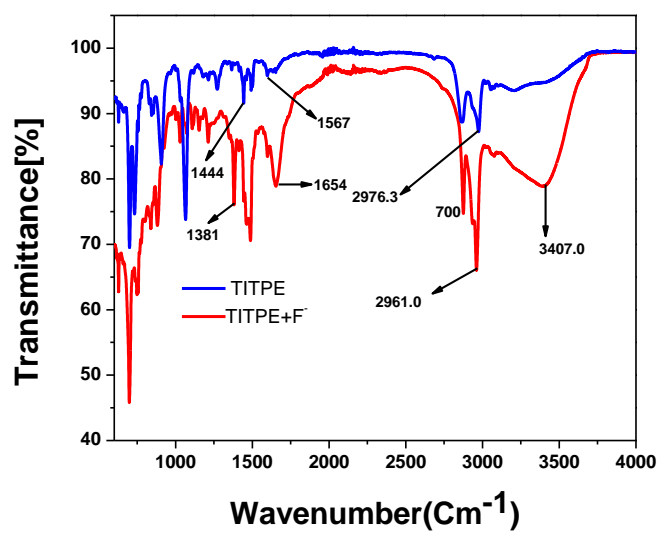

**Figure S10.** FT-IR spectra of TITPE and TITPE.F<sup>-</sup>

### 3. U.V-vis. and Fluorescence data

#### 3.1 Benesi-Hildebrand and LOD plots from UV-Vis. data

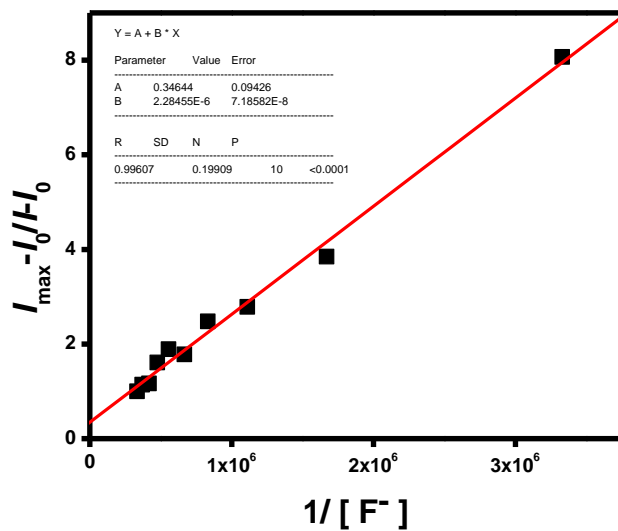

**Figure S11.** Benesi-Hildebrand plot for the determination of the binding constant of DTITPE in THF using fluorescence emission data.

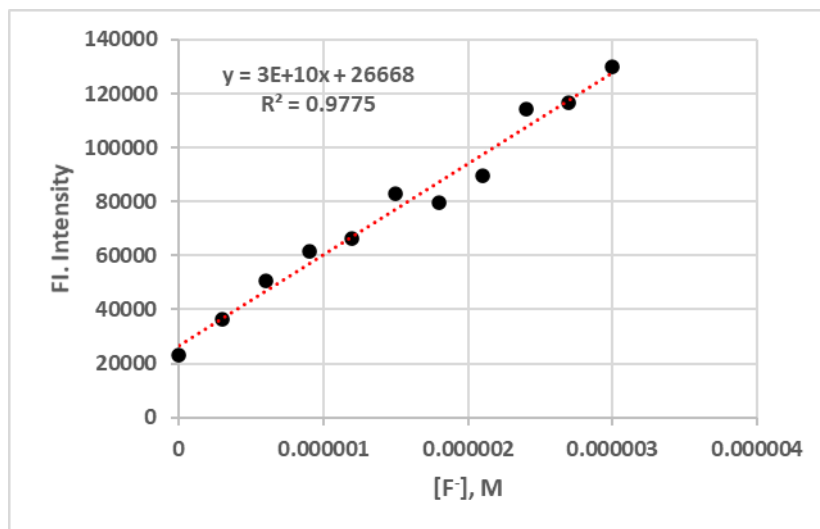

**Figure S12.** Determination of the detection limit of DTITPE in THF using fluorescence emission data.

#### 3.2 Benesi-Hildebrand and LOD plots from UV-vis. data

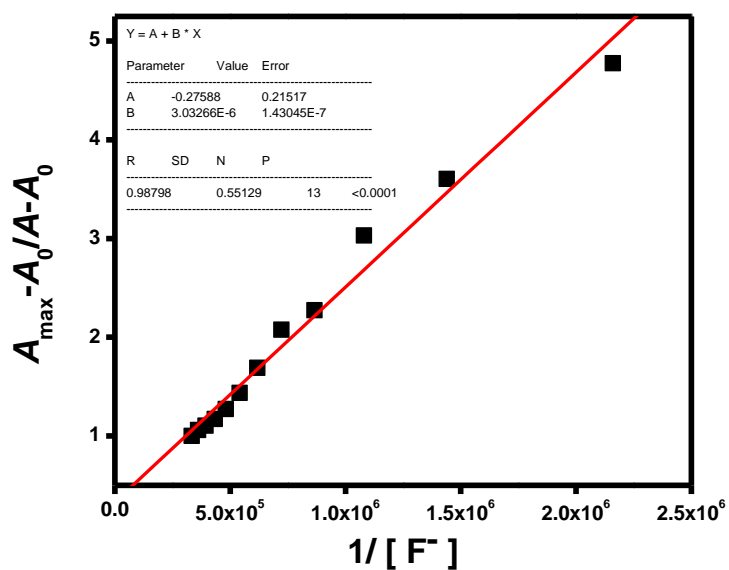

**Figure S13.** Benesi-Hildebrand plot for the determination of the binding constant of DTITPE in THF using UV-vis. absorption data.

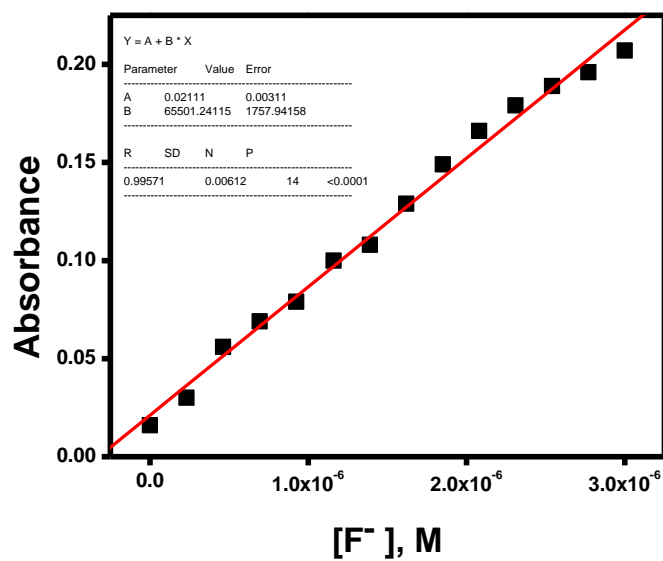

**Figure S14.** Determination of the detection limit of DTITPE in THF using UV-vis. absorption data in THF.

### 3.3 Job's plot



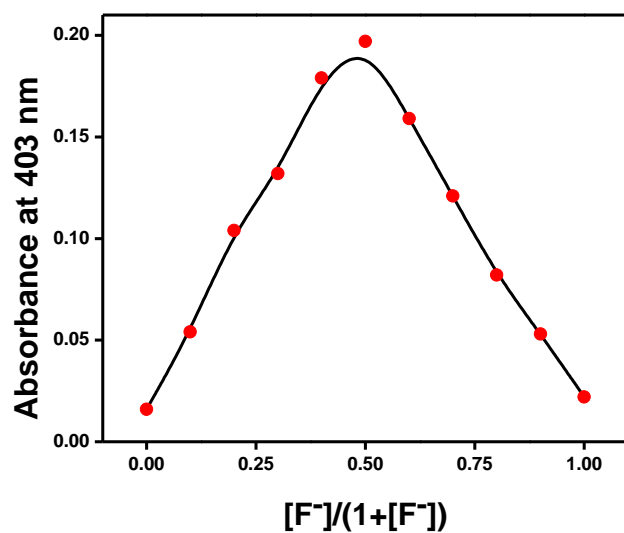

**Figure S15.** Determination of the stoichiometric ratio between DTITPE and F<sup>-</sup> in THF by Job's plot.

### 3.4 <sup>1</sup>H-NMR Data

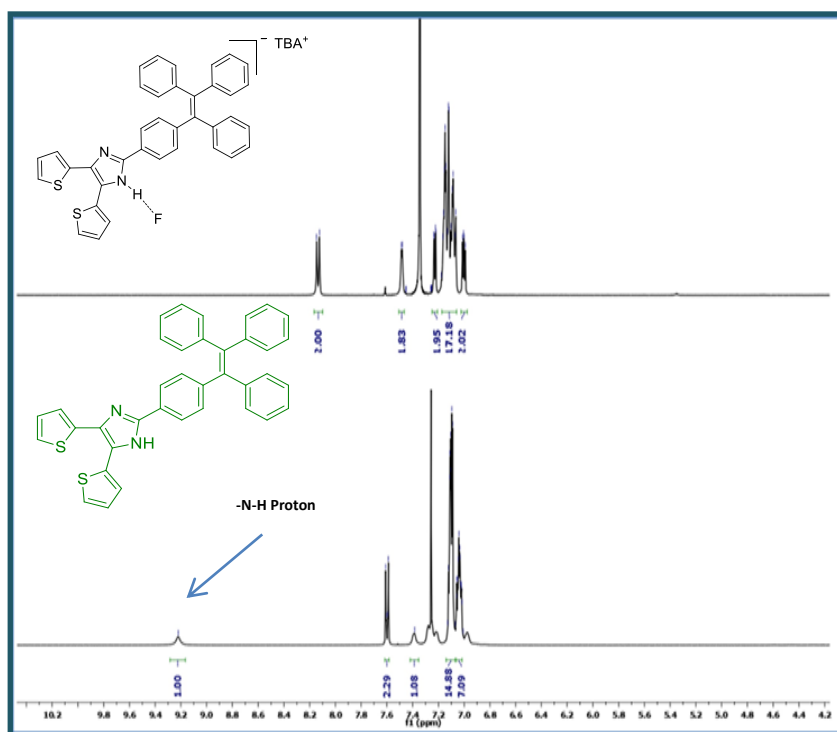

**Figure S16a.** <sup>1</sup>H NMR Spectra of DTITPE and DTITPE.F<sup>-</sup>.

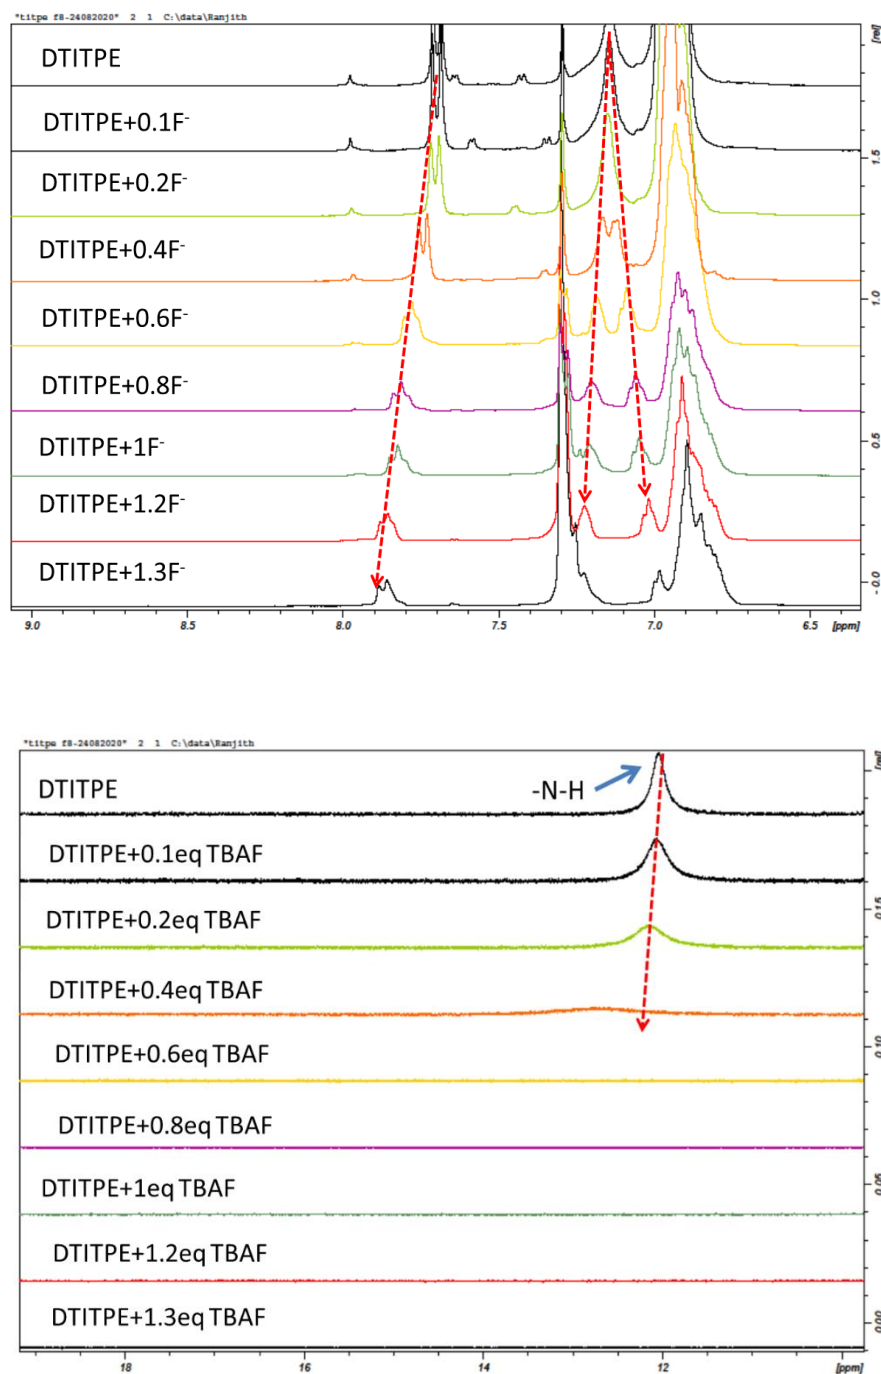

**Figure S16b.** <sup>1</sup>H NMR spectrum of the molecular sensor DTITPE with incremental addition of TBAF, in CDCl<sub>3</sub> at room temperature.

#### 4. DFT Studies

#### 4.1 Optimized geometry of DTITPE: B3LYP/6-31+G(d,p)

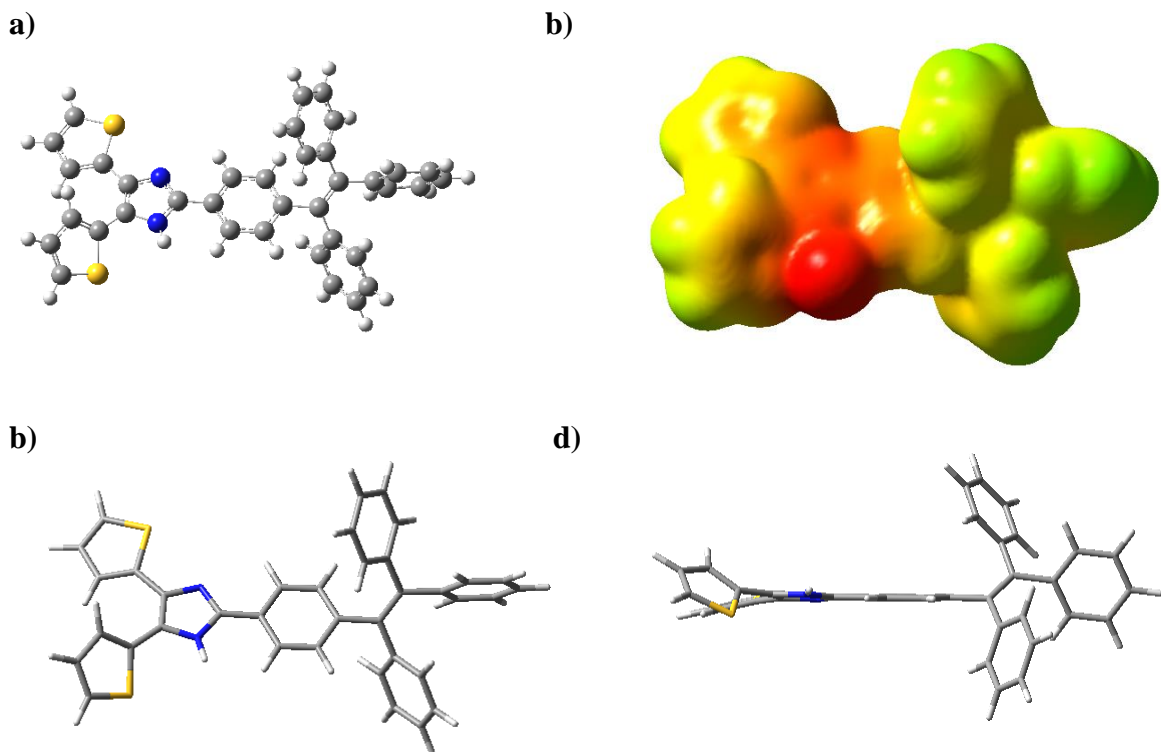

**Figure S17:** Optimized geometry of DTITPE, b) Electrostatic potential (ESP) (isovalue = 0.02) surfaces of DTITPE, c) Top view of DTITPE, and d) Side view of DTITPE.

From the optimized structure, the N-H distance is 1.009 Å, the dihedral angle between two thiophene rings is  $-4.48^\circ$ , dihedral angle between the two *cis* phenyl rings is  $11.93^\circ$ , and the dihedral angle between the two *trans* phenyl rings  $-167.80^\circ$

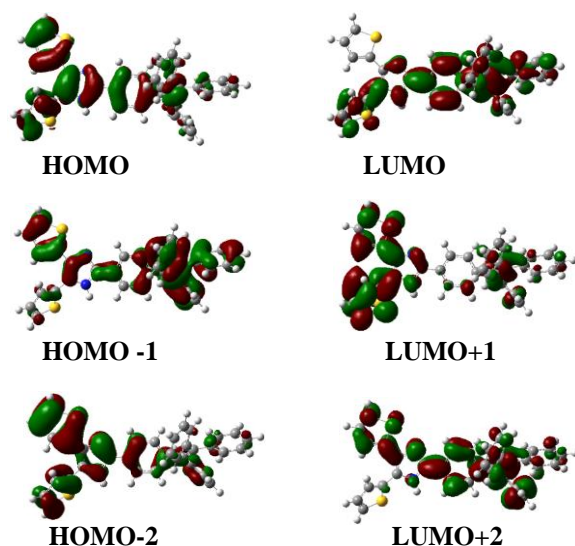

**Figure S18.** DFT optimized electronic distributions of DTITPE for various HOMO and LUMO energy levels.

#### 4.2 Optimized geometry of DTITPE.F<sup>-</sup> with F: B3LYP/6-31+G(d,p)

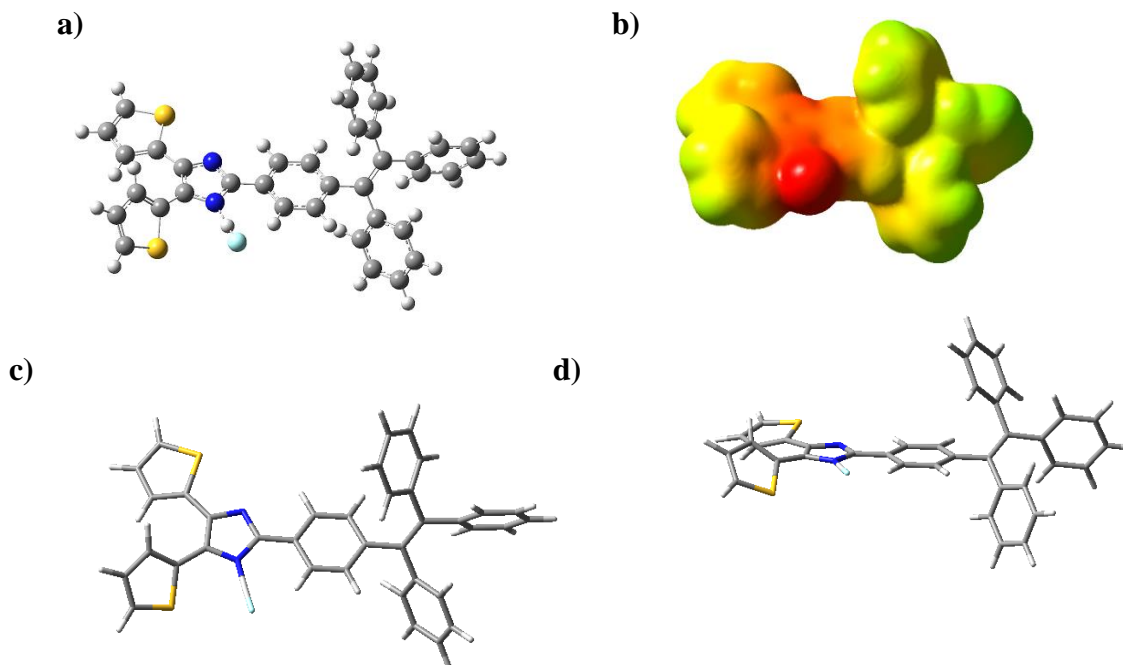

**Figure S19** a) Optimized geometry of DTITPE.F<sup>-</sup> b) Electrostatic potential (ESP) (isovalue = 0.02) surface of DTITPE.F<sup>-</sup> c) Top view of DTITPE.F<sup>-</sup>, and d) Side view of DTITPE.F<sup>-</sup>

For the geometry optimized structure, the N-H distance is 1.474 Å, the N-H...F<sup>-</sup> distance is 1.025 Å, the dihedral angle between two thiophene rings is -4.60°, the dihedral angle between

two *cis* phenyl rings is 13.26°, and the dihedral angle between the two *trans* phenyl rings - 166.65°.

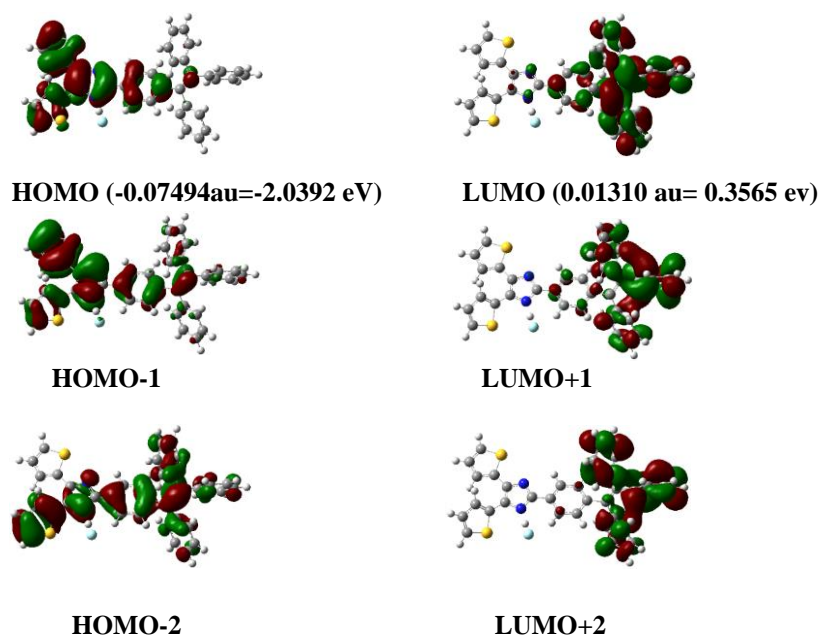

**Figure S20.** DFT optimized electronic distributions of DTITPE.F<sup>-</sup> at various HOMO and LUMO energy levels.

#### 4.3 Optimized geometry of deprotonated DTITPE (DTITPE<sup>-</sup>): B3LYP/6-31+G(d,p):

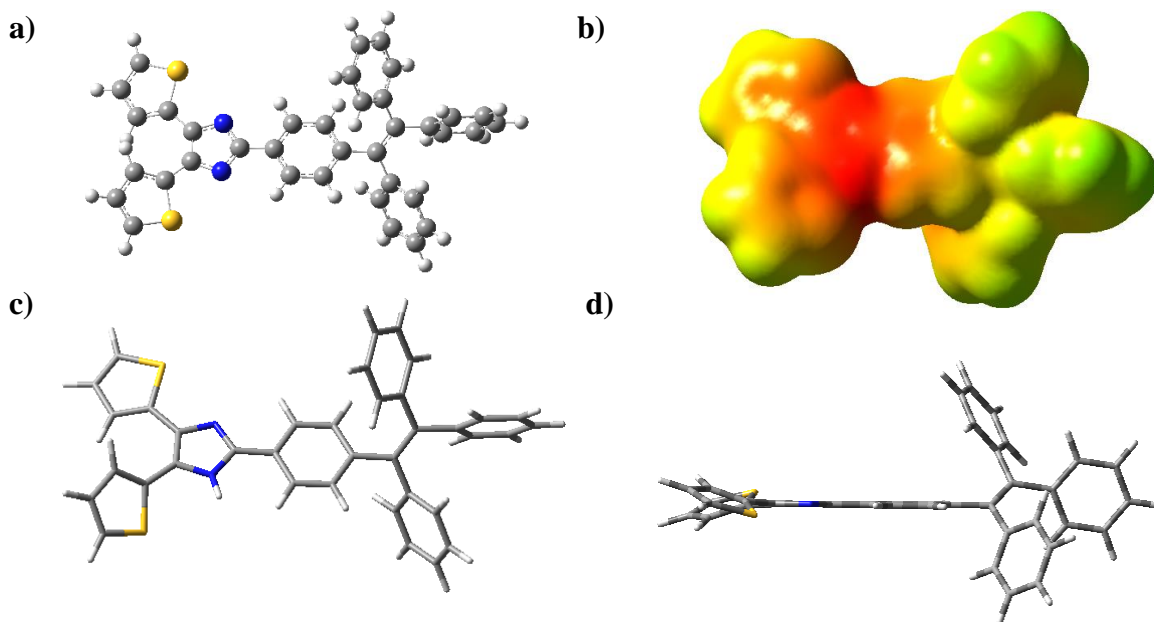

**Figure S21** a) Optimized geometry of deprotonated DTITPE<sup>-</sup>, b) The electrostatic potential (ESP) (isovalue = 0.02) surface of DTITPE<sup>-</sup>, c) Top view of DTITPE<sup>-</sup>, and d) Side view of DTITPE<sup>-</sup>.

From the optimized geometry, the dihedral angle between the two thiophene rings is  $-5.01^\circ$ , the dihedral angle between the two *cis* phenyl rings is  $14.09^\circ$ , and the dihedral angle between the two *trans* phenyl rings is  $-165.79^\circ$

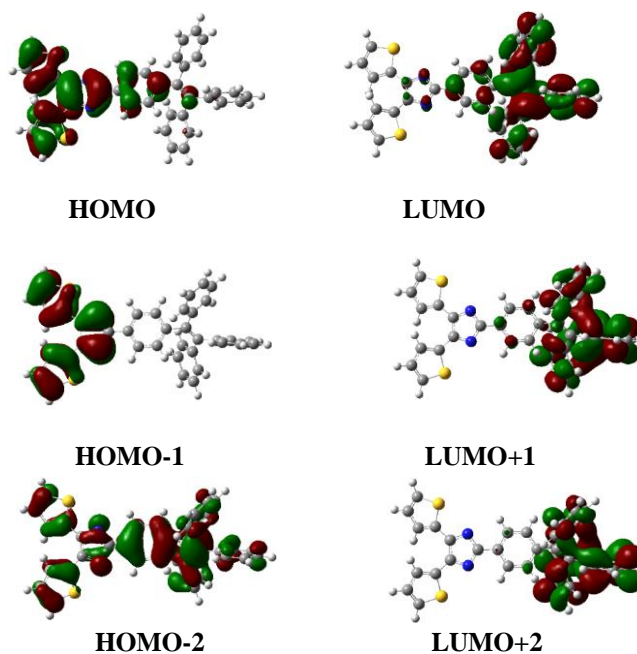

**Figure S22.** DFT optimized electronic distributions of DTITPE<sup>-</sup> at various HOMO and LUMO energy levels.

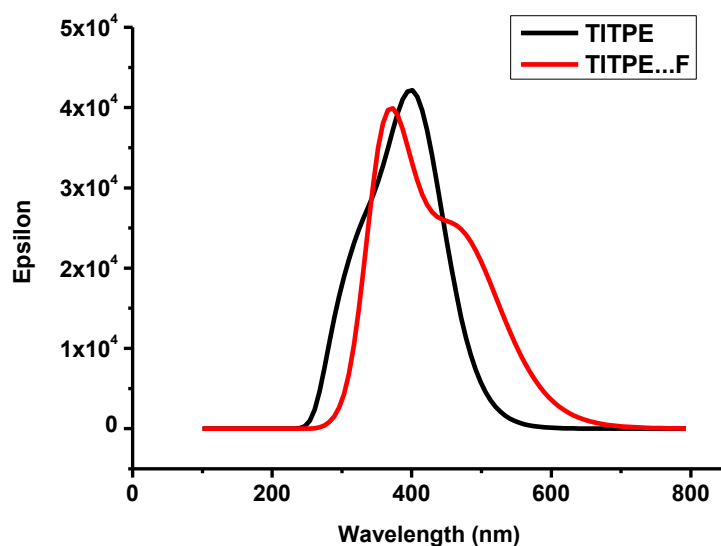

**Figure S23:** Theoretical UV-vis. spectra for DTITPE and DTITPE.F<sup>-</sup> calculated using TD-DFT/B3LYP/6-31+G(d,p) with the CPCM method using THF as solvent.

**Table S1.** Calculated bond lengths and dihedral angles of DTITPE, DTITPE.F<sup>-</sup> and DTITPE<sup>-</sup> using B3LYP/6-31+G(d,p) method.

|                             | N-H     | N-H...F <sup>-</sup> | Dihedral angles<br>between two<br>thiophene rings | Dihedral angles between<br>two phenyl rings |              |
|-----------------------------|---------|----------------------|---------------------------------------------------|---------------------------------------------|--------------|
|                             |         |                      |                                                   | <i>Cis</i>                                  | <i>Trans</i> |
| <b>DTITPE</b>               | 1.009 Å | -                    | -4.48°                                            | 11.93°                                      | -167.80°     |
| <b>DTITPE.F<sup>-</sup></b> | 1.474 Å | 1.025 Å              | -4.60°                                            | 13.26°                                      | -166.65°     |
| <b>DTITPE<sup>-</sup></b>   | -       | -                    | -5.01°                                            | 14.09°                                      | -165.79°     |

**Table S2:** Calculated HOMO and LUMO energies and band gaps for DTITPE, DTITPE.F<sup>-</sup> and DTITPE<sup>-</sup> calculated using B3LYP/6-31+G(d,p) method

| HTM                   | HOMO (eV) | LUMO (eV) | Band gap (eV) | Dipole moment B3lyp/6-31+G(d,p) | Transition dipole Moment B3lyp/6-31+G(d,p)-pcm |
|-----------------------|-----------|-----------|---------------|---------------------------------|------------------------------------------------|
| DTITPE                | -5.247    | -1.824    | 3.423         | 3.0708                          | 11.6290                                        |
| DTITPE.F <sup>-</sup> | -2.039    | 0.356     | 1.683         | 11.4063                         | 8.4150                                         |
| DTITPE <sup>-</sup>   | -1.663    | 0.412     | 1.250         | 12.0619                         | 9.1926                                         |

**Table S3:** Theoretical energy levels and MO character for DTITPE, DTITPE.F<sup>-</sup> and DTITPE<sup>-</sup> calculated using TD-DFT/B3LYP/6-31+G(d,p) with CPCM method using THF as solvent

| Compound              |                  | $\lambda$ (nm) | CIC                                                     | OS(f)  |
|-----------------------|------------------|----------------|---------------------------------------------------------|--------|
| DTITPE,               | S0 to S1         | 406.70         | HOMO->LUMO (98%)                                        | 0.8198 |
| DTITPE.F <sup>-</sup> | S0 to S1         | 648.92         | H-1->LUMO(55%),<br>HOMO->LUMO (24%)                     | 0.17   |
|                       | Excited State 7  | 396.20         | H-9->LUMO (22%),<br>H-7->LUMO (13%),<br>H-4->LUMO (38%) | 0.03   |
| DTITPE <sup>-</sup>   | Excited State 11 | 441.61         | HOMO->L+1 (67%)                                         | 0.16   |



**Table S4:** Comparison of the imidazole derived molecular sensors and their sensing properties.

| Sensor no | Mechanism                                                        | Detection limit (M)   | Stoichiometry | Reference |
|-----------|------------------------------------------------------------------|-----------------------|---------------|-----------|
| 1         | H-bonding interaction and subsequent deprotonation of imidazole. | $5.63 \times 10^{-5}$ | 1:2           | 1         |
| 2         | H- bonding induced internal charge transfer.                     | $<0.3 \times 10^{-3}$ | 1:1           | 2         |
| 3         | Formation of hydrogen bonding with imidazole N-H                 | $1.8 \times 10^{-6}$  | 1:2           | 3         |
| 4         | Deprotonation of imidazole N-H.                                  | $0.5 \times 10^{-6}$  | 1:1           | 4         |
| 5         | Formation of hydrogen bonding with imidazole N-H                 | $1.37 \times 10^{-7}$ | 1:1           | This work |

## 5 X-ray Crystallographic Data

Crystals of DTITPE suitable for single-crystal X-ray diffraction were obtained from THF/hexane. Using a drop of inert oil (Paratone), a selected crystal was mounted on a nylon loop and transferred to a stream of cold nitrogen. The reflections were collected on a D8 Bruker diffractometer equipped with an APEX-II area detector using graphite-monochromated Mo K $\alpha$  radiation ( $\lambda = 0.71073 \text{ \AA}$ ) from a 1  $\mu$ S microsource. The computer programs SMART [5] and SAINT [6] were used for data collection and data processing, respectively, and absorption corrections using SADABS [7]. The structure was solved using direct methods and refined with full-matrix least-squares methods on  $F^2$  using the SHELXTL package [8-9]. The imidazole proton was located in the difference Fourier map and the thienyl group containing S1 was disordered (0.749:0.251) by a 180° rotation about the C28–C30 bond. The CCDC number for DTITPE is 1988020

**Table S5.** Crystal data and structure refinement for DTITPE.

|                                 |                                                               |
|---------------------------------|---------------------------------------------------------------|
| Identification code             | TITPE                                                         |
| Empirical formula               | C <sub>37</sub> H <sub>26</sub> N <sub>2</sub> S <sub>2</sub> |
| Moiety formula                  | C <sub>37</sub> H <sub>26</sub> N <sub>2</sub> S <sub>2</sub> |
| Formula weight                  | 562.72                                                        |
| Temperature                     | 100(2) K                                                      |
| Wavelength                      | 0.71073 Å                                                     |
| Crystal system                  | Orthorhombic                                                  |
| Space group                     | Pn a 21                                                       |
| Unit cell dimensions            |                                                               |
| $\alpha = 90^\circ$             | $a = 9.1492(15) \text{ \AA}$                                  |
| $\beta = 90^\circ$              | $b = 21.940(4) \text{ \AA}$                                   |
| $\gamma = 90^\circ$             | $c = 14.903(3) \text{ \AA}$                                   |
| Volume                          | 2991.7(9) Å <sup>3</sup>                                      |
| Z                               | 4                                                             |
| Density (calculated)            | 1.249 Mg/m <sup>3</sup>                                       |
| Absorption coefficient          | 0.207 mm <sup>-1</sup>                                        |
| F(000)                          | 1176                                                          |
| Crystal size                    | 0.482 x 0.134 x 0.094 mm <sup>3</sup>                         |
| Theta range for data collection | 1.652 to 29.940°                                              |
| Index ranges                    | -11 ≤ h ≤ 12, -30 ≤ k ≤ 27, -20 ≤ l ≤ 20                      |
| Reflections collected           | 32612                                                         |
| Independent reflections         | 8620 [R(int) = 0.0288]                                        |
| Observed reflections            | 7933                                                          |
| Completeness to theta = 29.940° | 99.9 %                                                        |
| Absorption correction           | Semi-empirical from equivalents                               |
| Max. and min. transmission      | 0.746 and 0.723                                               |
| Refinement method               | Full-matrix least-squares on F <sup>2</sup>                   |

|                                   |                                    |
|-----------------------------------|------------------------------------|
| Data / restraints / parameters    | 8620 / 6 / 386                     |
| Goodness-of-fit on F <sup>2</sup> | 1.032                              |
| Final R indices [I>2σ(I)]         | R1 = 0.0356, wR2 = 0.0880          |
| R indices (all data)              | R1 = 0.0407, wR2 = 0.0910          |
| Absolute structure parameter      | 0.095(19)                          |
| Extinction coefficient            | n/a                                |
| Largest diff. peak and hole       | 0.478 and -0.312 e.Å <sup>-3</sup> |

## References

1. Wu, Y.-C.; Huo, J.-P.; Cao, L.; Ding, S.; Wang, L.-Y.; Cao, D.; Wang, Z.-Y., Design and application of tri-benzimidazolyl star-shape molecules as fluorescent chemosensors for the fast-response detection of fluoride ion. *Sens. Actuators B Chem.* **2016**, *237*, 865-875, doi: 10.1016/j.snb.2016.07.028
2. Swami, S.; Behera, D.; Agarwala, A.; Verma, V. P.; Shrivastava, R., β-Carboline–imidazopyridine hybrids: selective and sensitive optical sensors for copper and fluoride ions. *New J. Chem.* **2018**, *42*, 10317-10326, doi: 10.1039/c8nj01851k
3. Naha, S.; Velmathi, S. J. C., Phenazine - Based Fluorescence “Turn - Off” Sensor for Fluoride: Application on Real Samples and to Cell and Zebrafish Imaging. *ChemistrySelect*, **2019**, *4*, 2912-2917, doi: 10.1002/slct.201803702
4. Bhattacharyya, B.; Kundu, A.; Guchhait, N.; Dhara, K. J. J. o. f., Anthraimidazoledione Based Reversible and Reusable Selective Chemosensors for Fluoride Ion: Naked-Eye, Colorimetric and Fluorescence “ON-OFF”. *J. Fluoresc.* **2017**, *27*, 1041-1049, doi:10.1007/s10895-017-2038-x.
5. SMART Software ver. 5.625 for the CCD Detector System; Bruker AXS Inc.: Madison, WI, USA, 2001.
6. SAINTPLUS software ver. 6.22 for the CCD Detector System; Bruker AXS Inc.: Madison, WI, USA, 2001.
7. Blessing, R.H. An empirical correction for absorption anisotropy. *Acta Crystallogr., Sect. A: Found. Crystallogr.* **1995**, *51*, 33–38, doi.org/10.1107/S0108767394005726.
8. Sheldrick, G.M. SHELXTL software ver. **2013/4**; Universität Göttingen: Göttingen, Germany, 2013.
9. Sheldrick, G.M. A short history of SHELX. *Acta Crystallogr., Sect. A: Found. Crystallogr.* **2008**, *64*, 112–122, doi.org/10.1107/S0108767307043930
